# Supplementary material for: miR-30a-5p mitigates autophagy by regulating the Beclin-1/ATG16 pathway in renal ischemia/reperfusion injury
Source: PubMed Central journal article supplement — Int J Mol Med. 2021 Jun 2;48(1):144. doi: 10.3892/ijmm.2021.4977 (PMC8175063; doi:10.3892/ijmm.2021.4977), 2021-06-02

Figure S1. Effects of miR-30a-5p mimic or miR-30a-5p inhibitor transfection on the expression levels of miR-30a-5p in HK-2 cells. HK-2 cells were transfected with mimic-nc, miR-30a-5p mimic, inhibitor-nc or miR-30a-5p inhibitor, and the expression levels of miR-30a-5p were detected using reverse transcription-quantitative PCR (n=3). \*P<0.05 vs. control. miR, microRNA; nc, negative control.

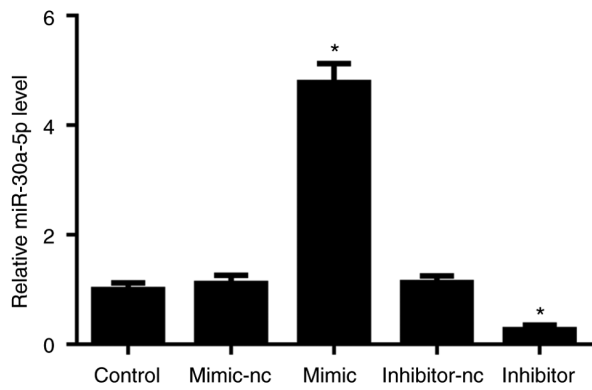

Figure S2. Effects of Beclin-1 siRNA or pcDNA3.1-Beclin-1 transfection on the expression levels of Beclin-1 in HK-2 cells. HK-2 cells were transfected with scramble siRNA, Beclin-1 siRNA, pcDNA3.1 empty vector or pcDNA3.1-Beclin-1. (A) Beclin-1 mRNA expression levels of were detected using reverse transcription-quantitative PCR. (B) Beclin-1 protein levels of were detected using western blotting and semi-quantified (n=3). \*P<0.05 vs. control. siRNA, small interfering RNA.

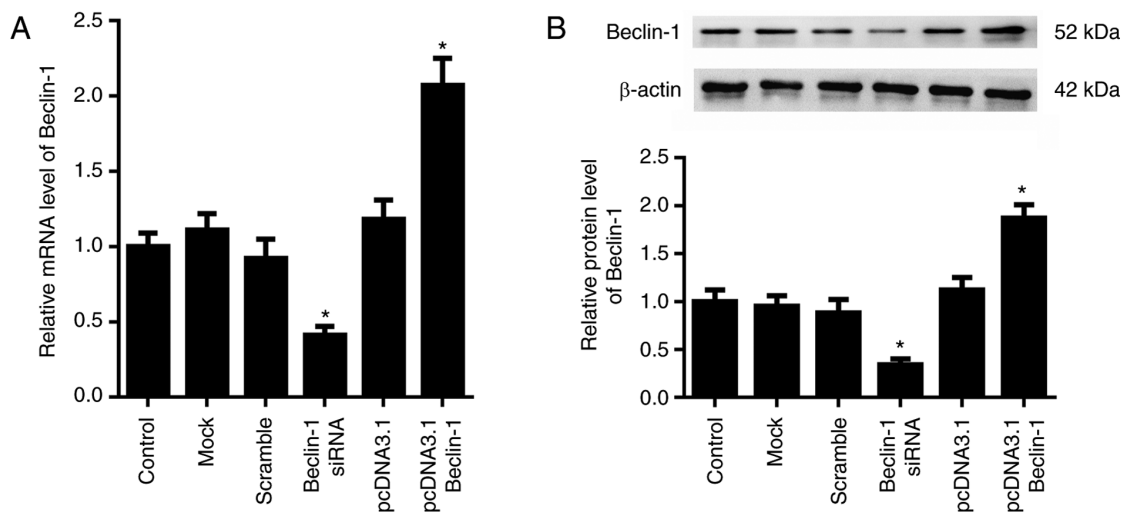

Figure S3. Effects of ATG16 siRNA transfection on ATG16 expression in HK-2 cells. HK-2 cells were transfected with ATG16 siRNA and the (A) mRNA (B) protein expression levels of ATG16 were detected by revers transcription-quantitative PCR and western blotting, respectively. (n=3). \*P<0.05 vs. control. ATG16 autophagy-related gene 16; siRNA, small interfering RNA.

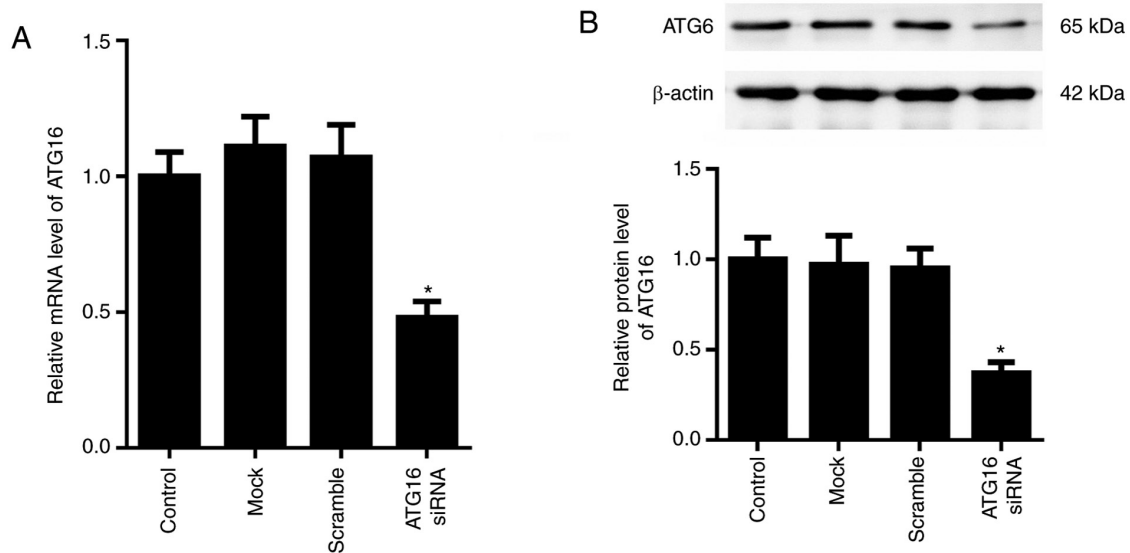

Supplement: Supplementary_Data.pdf [file Supplementary_Data.pdf]
